# Supplementary material for: A novel competitive-displacement fluorescence assay for l-penicillamine based on the reaction between the target and N-acetyl-l-cysteine-capped CdTe quantum dots for copper ions
Source: Royal Society of Chemistry journal article supplement (doi:10.1039/c8ay00515j), 2018-01-01
Supplement: c8ay00515j1.pdf [file c8ay00515j1.pdf]

## Supplementary data

### Novel competitive-displacement fluorescent assay for L-Penicillamine based on reaction between target and N-acetyl-L-cysteine-capped CdTe quantum dots for copper ion

Yunmei Huang<sup>a</sup>, Jidong Yang<sup>a,b\*</sup>, Haiyan Yuan<sup>a</sup>, Yuan Guo<sup>a</sup>, Xiaoqing Zeng<sup>a</sup>, Jiawei Cheng<sup>a</sup>, Yuhui Zhang<sup>a</sup>

<sup>a</sup> Key Laboratory of Water Environment Evolution and Pollution Control in Three Gorges Reservoir, Chongqing Three Gorges University, Wanzhou, Chongqing, 404100, China.

<sup>b</sup> School of Chemistry and Chemical Engineering, Southwest University, Chongqing 400715, P.R. China.

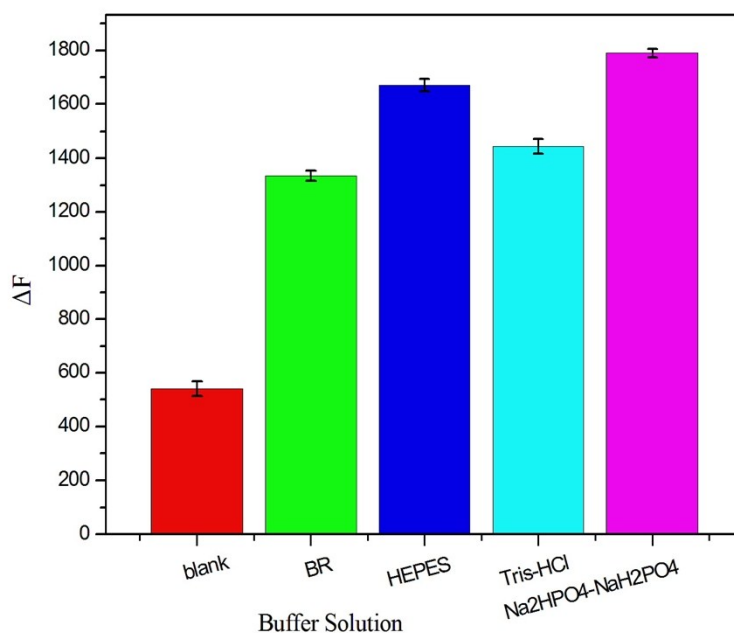

Figure S1. The choice of buffers kinds. NALC- CdTe QDs:100μL; Cu<sup>2+</sup> : 4×10<sup>-7</sup>mol/L; L-PA:1×10<sup>-5</sup>mol/L in different buffers, respectively.

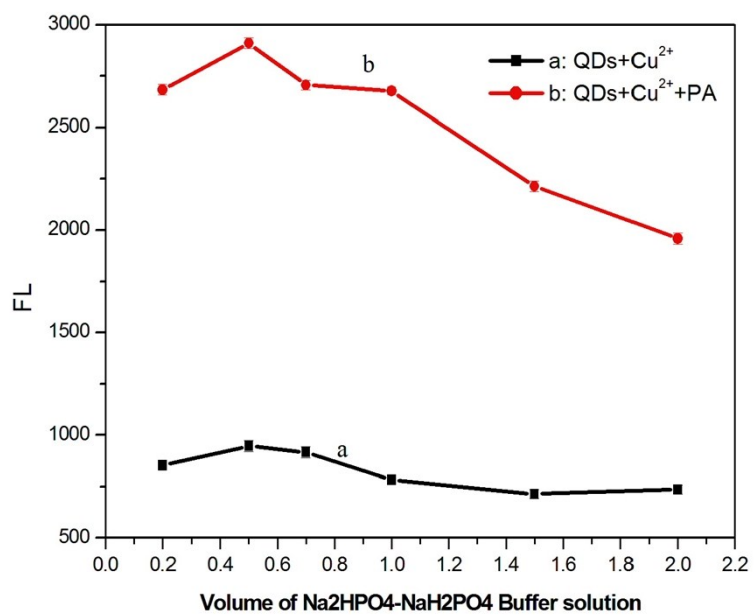

Figure S2. The effect of the volume of the buffer solution. NALC- CdTe QDs:100 $\mu$ L; Cu<sup>2+</sup> : 4 $\times$ 10<sup>-7</sup>mol/L; L-PA:1 $\times$ 10<sup>-5</sup>mol/L in different valume of NaH<sub>2</sub>PO<sub>4</sub> -Na<sub>2</sub>HPO<sub>4</sub> buffers, respectively.
